# Supplementary material for: The Examination of Viral Characteristics of HIV-1 CRF07_BC and Its Potential Interaction with Extracellular Galectin-3
Source: PubMed Central journal article supplement (PMC7350312; doi:10.3390/pathogens9060425), 2020-05-29
Supplement: pathogens-09-00425-s001.pdf [file pathogens-09-00425-s001.pdf]

## Supplementary data

### Materials and Methods:

#### *HIV-1 CRF07\_BC infectious clone*

The CRF07\_BC isolate was collected from injected drug users (IDUs) and propagated in fresh IL-2 stimulated PBMCs. The proviral DNA was extracted using the Qiagen blood DNA kit (Qiagen, Hilden, Germany) from infected PBMCs. Specific primers were designed to amplify the full-length HIV DNA provirus as referenced [14]. The two partial molecules of the entire CRF07\_BC genome were amplified with the Platinum Taq DNA polymerase High Fidelity kit (Invitrogen, Carlsberg, USA). The 5' partial fragment and 3' partial fragment were amplified using the primers 5LTR-F/Pol-R and Pol-F/3LTR-R, respectively. Both 5' partial fragment and 3' partial fragment containing the overlapping region were used as templates to generate full length CRF07\_BC genome carrying SphI and EcoRV restriction sites at the 5' and 3' terminal, respectively, with the primers 5LTR-F/3LTR-R. The CRF07\_BC full length genome was further cloned into pUC-57 vector. The morphology and infectivity of this infectious clone were validated.

| Primer | Sequence                                        | Region |
|--------|-------------------------------------------------|--------|
| 5LTR-F | 5'-GATAT-GGATCCTGGAAGGGCTAATTCAGGAAAA-3'        | 5'LTR  |
| Pol-R  | 5'GTAATTCGTTAGTTTGTATGTCTGTTGCTATTATATCTATT -3' | pol    |
| Pol-F  | 5'-CAGTGGCTACATGGAAGCAGAGGTTATCCCAGCAG-5'       | pol    |
| 3LTR-R | 5'-GCATGC-GCGGCCGCACGCGTGGTCTGAGGGATCTC-3'      | 3'LTR  |

#### *Virus titration*

HIV-1 virus titers were determined with a flow cytometry-based HIV-1 titration assay using GHOST /X4/R5 cells (GHOST are human osteosarcoma cells expressing high levels of CD4 and CCR5 and carrying LTR-GFP). The percentage of GFP expression in infected cells was measured and the Infectious Units (IU) were calculated. The virus titer was calculated by the equation- [Infectious Units (IU)/ml= (cell number) × (% of GFP-positive cells) × (dilution factor)] (The dilution factor = 1,000 µl /viral input (µl)). After the virus stocks were quantified, the experimental cells were infected at a specific multiplicity of infection (MOI). The MOI was determined via the equation: MOI = [(virus stock IU/ml) × (volume of virus used)]/(number of cells in infection). Most assays were used 10µl of CRF07\_BC viral stock (10<sup>6</sup>-10<sup>5</sup> IU/ml) administering to 10<sup>5</sup> cells/well (MOI=0.1-0.01).

#### *ELISA*

Purified HIV-1 CRF07\_BC viruses (0.1 ug of HIV-1 p24/well) or glycosylated gp120 recombinant proteins (HIV-1 CRF07\_BC) (0.1 ug/well) (Sino Biological, Cat. No. 11233-V08H) or recombinant human CD4 proteins (R&D Systems. Cat.No. 514-CD) were coated on 96 well plates in PBS buffer and held overnight at 4°C, blocked with 5% BSA in PBST (PBS buffer containing 0.05% Tween 20), and incubated for 1 hr at 37°C. Recombinant human galectin-3 or human galectin-3 CRD proteins (provided by GylcoCore, Institute of Biomedical Sciences, Academia Sinica, Taiwan) or recombinant gp120 proteins were added into the each well with/without co-treatment of lactose (50mM), sucrose (50mM) or B<sub>2</sub>C<sub>10</sub> monoclonal antibody (5-10 µg) at 37°C for 2 hrs. After three washes with PBST, rabbit anti-galectin-3 polyclonal antibodies or rabbit anti-CRF07\_BC gp120 polyclonal antibodies (Sino Biological, Cat. No. 11233-R011) (1:3000 dilutions) were added and incubated at 37°C for 1 hr. After three additional washes, horseradish peroxidase (HRP) conjugated sheep anti-rabbit IgG (1:3000 dilution) (Amersham Biosciences) was added prior to another 1 hr of incubation at 37°C. Finally, 200 µl of 0.015% o-phenylenediamine dihydrochloride substrate (Sigma-Aldrich, St. Louis, MO) was added before a final incubation at 37°C for

30 min. Reactions were stopped by 3N HCl and absorbances were measured with a spectrophotometer (490 nm).

#### *Co-immunoprecipitation (Co-IP)*

Jurkat-R5 cells were incubated with HIV-1 CRF07\_BC viruses (200ng p24) at 37°C for 1hr in presence of rhGal3 (1µM). After three washes with PBS, cells were treated with DSP (8 µg/ml) crosslinker (3,3'-dithiodipropionic acid di[N-hydroxysuccinimide ester]) (SIGMA) at room temperature for 30 min, incubated with 1M Tris-HCl (pH 7.5) at room temperature for 15 min, and lysed in NP-40 buffer (150 mM NaCl, 25 mM Tris-HCl [pH 7.4], 1 mM EDTA, 0.5% NP-40, and 5% glycerol and containing protease inhibitor cocktail) (CALBIOCHEM). Lysates were centrifuged at 16,000 × g and supernatants were immunoprecipitated with rabbit anti-Gal3 polyclonal antibodies. Aliquots were analyzed by SDS-PAGE and immunoblotting, using antibodies against CD4, galectin-3 and CRF07\_BC gp120.

#### *Life images for monitoring galectin-3 binding with HIV-1 to T cells*

HIV-1CRF07\_BC viruses were labeled with Alexa-555 fluorescent dye on the envelope by using Alexa Fluor 555 carboxylic acid, succinimidyl ester (Life Technology). Recombinant galectin-3 was labeled with Alexa-488 by using Lightning-Link Conjugation kit (Innova Biosciences). Alexa-555 envelope protein labeled CRF07\_BC viruses were mixed with Alexa-488 labeled galectin-3 recombinant proteins then subjected to Jurkat-R5 cells. The binding phenomenon of galectin-3 with CRF07\_BC to Jurkat-R5 was observed by LSM 780 confocal microscopy.

#### *Electron microscopy*

The transmission electron microscope (TEM) was used to analyze the characteristics of the HIV-1 CRF07\_BC virions and the Gal3 binding to HIV-1 CRF07\_BC virions. Briefly, the concentrated and purified viral stocks were inactivated with 0.025% formaldehyde solution. One drop (~3 µL) of inactive virus in 2% glutaraldehyde buffer was applied to glow-discharged TEM copper carbon-coated grids (Electron Microscopy Sciences). To study the interaction of Gal3 with CRF07\_BC virions, rGal3 (20 µg/ml) were incubated with 10ng p24 of CRF07\_BC virus for 1 h at room temperature, followed by centrifugation to concentrate the complexes. The complexes were dropped onto the grids, fixed and stained with goat anti-galectin-3 (Gal3), mouse anti-gp120 (Env) or control IgG (IgG), followed by Donkey anti-goat-labeled 6-nm gold particles and Donkey anti-mouse-labeled 18-nm gold particles. Following 4% uranyl acetate staining, grids were examined by Hitachi H-7000 Transmission Electron Microscope.

#### *Surface Plasmon Resonance (SPR)*

The SPR chip used in this study was BK7 glass slide coated with a laminated Cr/Au (2/50 nm) metal layer. A mixed self-assembled monolayer (SAM) of dithiols, which consisted of 90% C<sub>25</sub>H<sub>44</sub>O<sub>6</sub>S<sub>2</sub> and 10% C<sub>33</sub>H<sub>58</sub>O<sub>11</sub>S<sub>2</sub> (SensoPath Technologies, Bozeman, MT) was used as a diluent to mix with Cr/Au (at 1:9 ratio), generating a binding matrix for the formation of the receptor monolayer (CRF07\_BC gp120 protein) with the amine-coupling kit (Biacore, Inc. Uppsala, Sweden). The receptor was covalently immobilized to the SPR sensor chip according to the amine-coupling protocol. Finally, the ligands Gal3 in PBS solution were injected into the homemade flow-cell to interact with the immobilized receptor on the SPR sensor chip to form the receptor/ligand immunocomplex. To quantify the kinetic/affinity parameters between the receptor and the ligand, their interactions were measured by the surface plasmon resonance (SPR) biosensor which developed by Chou et al. [11].

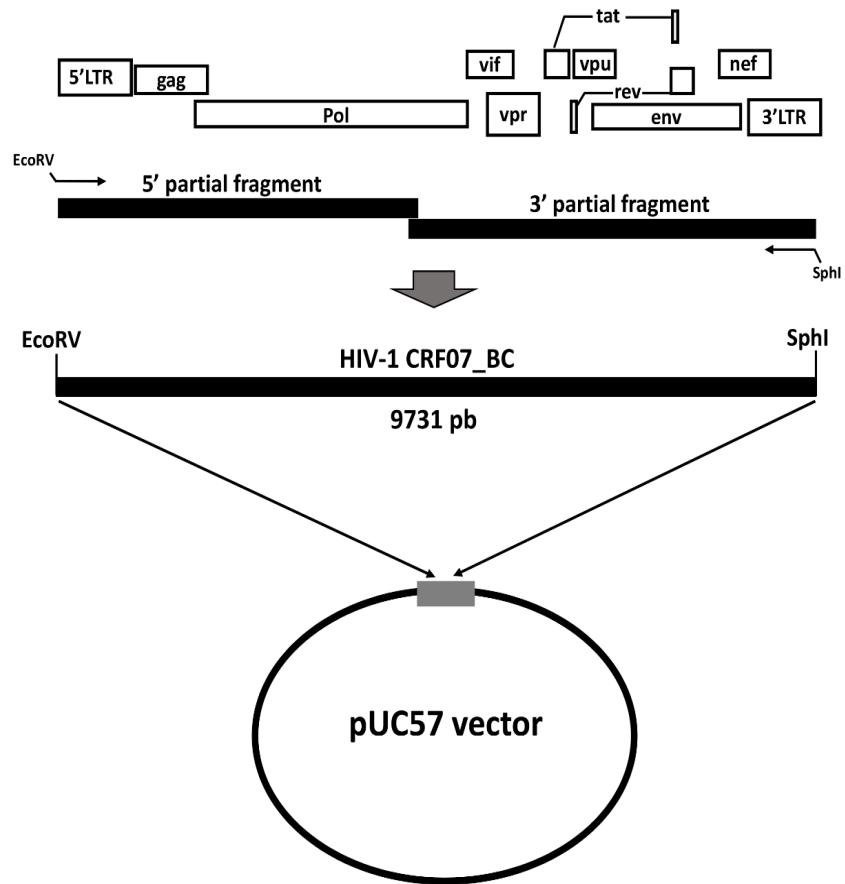

**Figure S1:** Generation of full-length molecular clones. Diagram of the full-length HIV-1 CRF07\_BC cloning.















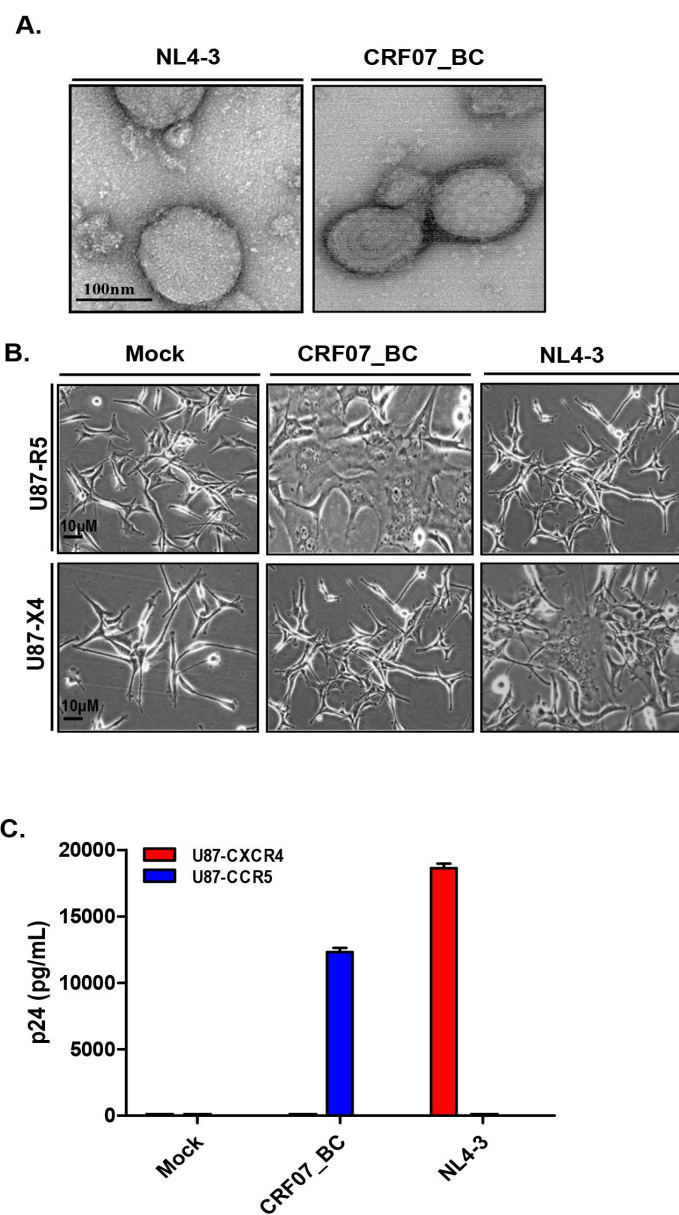

**Figure S3.** Determination of viral characteristics of HIV-1 CRF07\_BC viruses. (A) The pNL4-3 and pCRF07\_BC were transfected into HEK293T cells and the viral supernatants were subjected to TEM observation. (B) For determination of virus tropism, the HIV-1 CRF07\_BC and subtype NL4-3 viruses were administered to U87-R5 (upper panel) and U87-X4 cells (lower panel), and the virus-induced CPE of the cells was observed. (C) The viral supernatants collected from (B) were subjected to HIV-1 p24 determination.

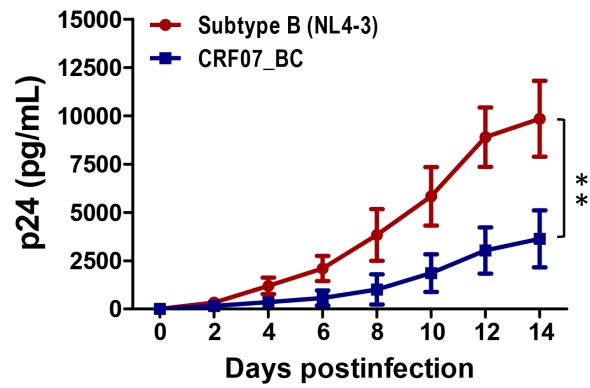

**Figure S4.** Viral characteristics of HIV-1 CRF07\_BC. Viral growth kinetics was conducted using Jurkat-R5 cells (the Jurkat-CXCR4-CCR5 stably expressing cells) infected with B subtype NL4-3 and CRF07\_BC viruses. The viral supernatants were collected at different time points and subjected to HIV-1 p24 determination. Quantitative data represent the mean  $\pm$  SD of results from three independent experiments (\*\*P < 0.01).

| Binding Constant       | Galectin-3             |
|------------------------|------------------------|
| Ka ( $M^{-1} S^{-1}$ ) | $4.567 \times 10^{-4}$ |
| Kd ( $S^{-1}$ )        | $3.223 \times 10^{-4}$ |
| KD(M)                  | $7.073 \times 10^{-9}$ |

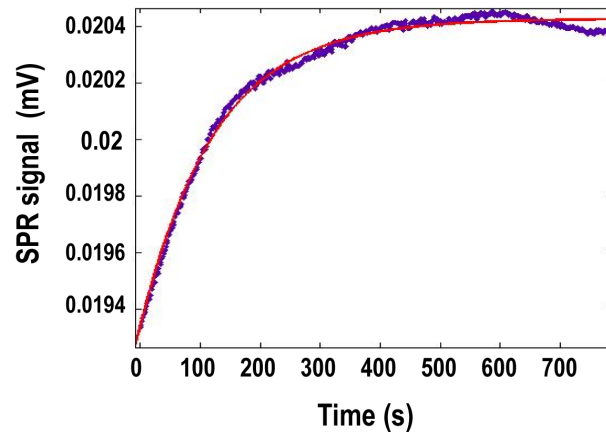

**Figure S5:** Determination of the binding affinities between galectin-3 and CRF07\_BC gp120. The binding affinities between Gal3 and HIV-1 CRF07\_BC gp120 were measured via SPR. The dissociation constant (KD) of galectin-3 was determined.

**Table S1. The genotyping of enrolled HIV-1(+) IDUs**

| Sample ID     | Genotyping           |                                               | Consistency |
|---------------|----------------------|-----------------------------------------------|-------------|
|               | <i>Multiplex PCR</i> | <i>Sequencing &amp; Phylogenetic analysis</i> |             |
| TWKMU_IDU_001 | CRF07_BC             | CRF07_BC                                      | Yes         |
| TWKMU_IDU_002 | CR07_BC              | CR07_BC                                       | Yes         |
| TWKMU_IDU_003 | B                    | B                                             | Yes         |
| TWKMU_IDU_004 | CRF07_BC             | CRF07_BC                                      | Yes         |
| TWKMU_IDU_005 | CRF07_BC             | CRF07_BC                                      | Yes         |
| TWKMU_IDU_006 | CRF07_BC             | CRF07_BC                                      | Yes         |
| TWKMU_IDU_007 | CRF07_BC             | CRF07_BC                                      | Yes         |
| TWKMU_IDU_008 | CRF07_BC             | CRF07_BC                                      | Yes         |
| TWKMU_IDU_009 | CRF07_BC             | CRF07_BC                                      | Yes         |
| TWKMU_IDU_010 | CRF07_BC             | CRF07_BC                                      | Yes         |
| TWKMU_IDU_011 | CRF07_BC             | CRF07_BC                                      | Yes         |
| TWKMU_IDU_012 | B                    | B                                             | Yes         |
| TWKMU_IDU_013 | CRF07_BC             | CRF07_BC                                      | Yes         |
| TWKMU_IDU_014 | B                    | B                                             | Yes         |
| TWKMU_IDU_015 | CRF07_BC             | CRF07_BC                                      | Yes         |
| TWKMU_IDU_016 | CRF07_BC             | CRF07_BC                                      | Yes         |
| TWKMU_IDU_017 | CRF07_BC             | CRF07_BC                                      | Yes         |
| TWKMU_IDU_018 | CRF01_AE             | CRF01_AE                                      | Yes         |
| TWKMU_IDU_019 | CRF07_BC             | CRF07_BC                                      | Yes         |
| TWKMU_IDU_020 | CRF07_BC             | CRF07_BC                                      | Yes         |
| TWKMU_IDU_021 | CRF07_BC             | CRF07_BC                                      | Yes         |
| TWKMU_IDU_022 | CRF07_BC             | CRF07_BC                                      | Yes         |
| TWKMU_IDU_023 | CRF07_BC             | CRF07_BC                                      | Yes         |
| TWKMU_IDU_024 | CRF07_BC             | CRF07_BC                                      | Yes         |
| TWKMU_IDU_025 | CRF07_BC             | CRF07_BC                                      | Yes         |
| TWKMU_IDU_026 | CRF07_BC             | CRF07_BC                                      | Yes         |
| TWKMU_IDU_027 | CRF07_BC             | CRF07_BC                                      | Yes         |
| TWKMU_IDU_028 | CRF07_BC             | CRF07_BC                                      | Yes         |
